# Supplementary material for: h5vc: scalable nucleotide tallies with HDF5
Source: PubMed Central journal article supplement (PMC4016699; doi:10.1093/bioinformatics/btu026), 2014-01-21
Supplement: supp_btu026_draft.supplement_23DEC2013.pdf [file supp_btu026_draft.supplement_23DEC2013.pdf]

| Dataset   | Definition                                                                                                          |
|-----------|---------------------------------------------------------------------------------------------------------------------|
| Counts    | table of observed mismatches with respect to the reference (4 dimensions) - [bases x samples x strands x positions] |
| Coverages | table of number of overlapping reads (3 dimensions) [samples x strands x positions]                                 |
| Deletions | table of observed deletions of bases (3 dimensions) [samples x strands x positions]                                 |
| Reference | one-dimensional vector containing the reference bases [positions]                                                   |

**Table 1.** Overview of the datasets present in an HDF5 tally file giving definitions of their content and a representation of the dimensions of the datasets.

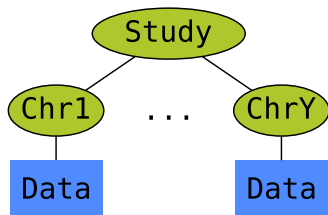

**Supplementary Figure 1.** Overview of the internal structure of a tally HDF5 file showing the tree structure with groups representing studies and chromosomes (contigs) as internal nodes and the 4 datasets defined in Supplementary Table 1 as leaves.

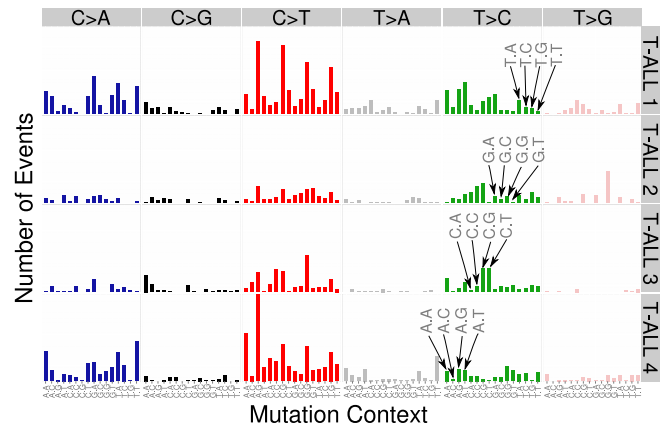

**Supplementary Figure 2.** Somatic mutation spectra plots, similar to those shown in Figure 2 of Alexandrov et al. (2013). The four rows of panels correspond to four cancer samples (T-ALL 1 to T-ALL 4), the six columns of panels to the possible base substitutions (C>A, C>G, C>T, T>A, T>C, T>G). Within each panel, a histogram of the mutations with that base substitution and all possible preceding and succeeding bases (i.e., the substitution’s local sequence context) is shown, encoded as `Prefix.Suffix`, e.g. A.C.

**REFERENCES**

Alexandrov LB, et al. Signatures of mutational processes in human cancer. *Nature*, 500(7463):415–421 (2013).
